# Supplementary material for: Phenotypic Reprogramming of Striatal Neurons into Dopaminergic Neuron-like Cells in the Adult Mouse Brain
Source: PubMed Central journal article supplement — Stem Cell Reports. 2018 Oct 11;11(5):1156–70. doi: 10.1016/j.stemcr.2018.09.004 (PMC6234859; doi:10.1016/j.stemcr.2018.09.004), 2018-10-11
Supplement: mmc1.pdf [file mmc1.pdf]

**Stem Cell Reports, Volume 11**

**Supplemental Information**

**Phenotypic Reprogramming of Striatal Neurons into Dopaminergic  
Neuron-like Cells in the Adult Mouse Brain**

**Wenze Niu, Tong Zang, Lei-Lei Wang, Yuhua Zou, and Chun-Li Zhang**

## **Inventory of Supplemental Information:**

Figure S1. Antibody specificity for TH staining in the adult mouse brain, related to Figure 1.

Figure S2. An in vivo screen to identify factors for inducing TH<sup>+</sup> cells in the adult mouse striatum, related to Figure 1.

Figure S3. Genetic tracing of neuroblasts in the subventricular zone of adult mGfap-Cre;Rosa-tdT mice, related to Figure 3.

Figure S4. iDALs in injected striatal region far away from the lateral ventricle, related to Figure 3.

Figure S5. Tracing iDALs in the striatum of Prp-CreERT;Rosa-tdT mice, related to Figure 4.

Figure S6. Expression of viral SOX2 in striatal neurons and iDALs, related to Figure 4.

Figure S7. Verification of cell identity after patch-clamp recordings, related to Figures 6 and 7.

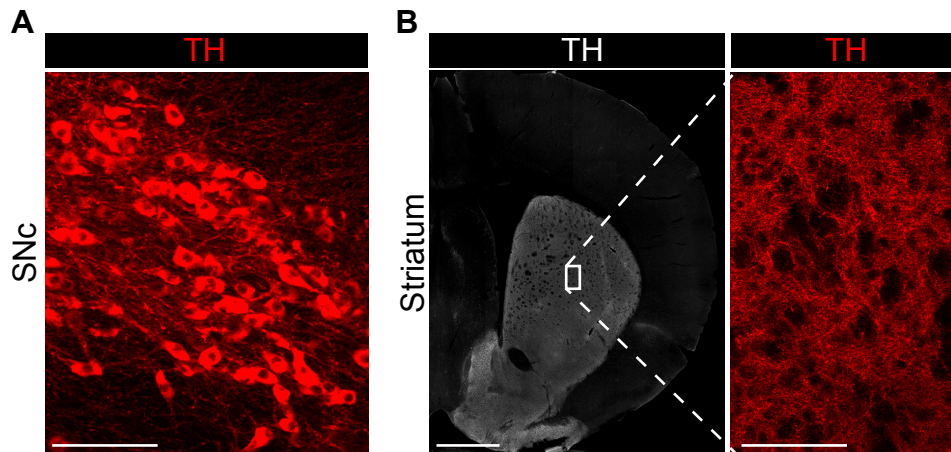

**Figure S1.** Antibody specificity for TH staining in the adult mouse brain, related to Figure 1.

(A) A representative image of TH<sup>+</sup> neurons in the substantia nigra pars compacta (SNc). Neuronal somas and processes are clearly stained with the TH antibody. Scale bar: 100  $\mu$ m.

(B) TH<sup>+</sup> neuronal processes in the striatum. No somas were stained with TH in the core striatum. Scale bars: 1.0 mm (in lower magnification view) and 100  $\mu$ m (in higher magnification view).

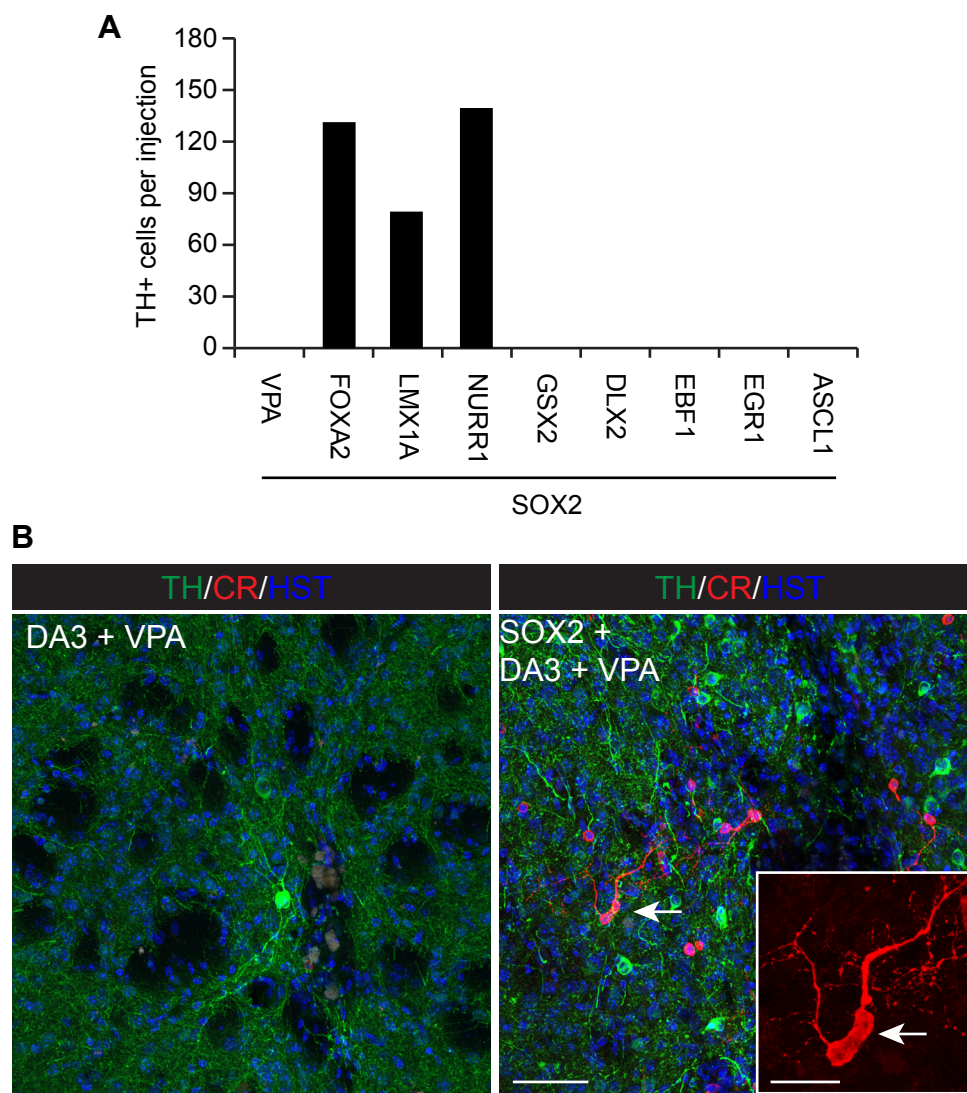

**Figure S2.** An in vivo screen to identify factors for inducing TH<sup>+</sup> cells in the adult mouse striatum, related to Figure 1.

(A) TH<sup>+</sup> somas were quantified at 8 weeks post virus injections in the adult mouse striatum (n=3-4 mice).

(B) Calretinin (CR)<sup>+</sup> cells in the virus-injected striatal region. Scale bar: 20  $\mu$ m

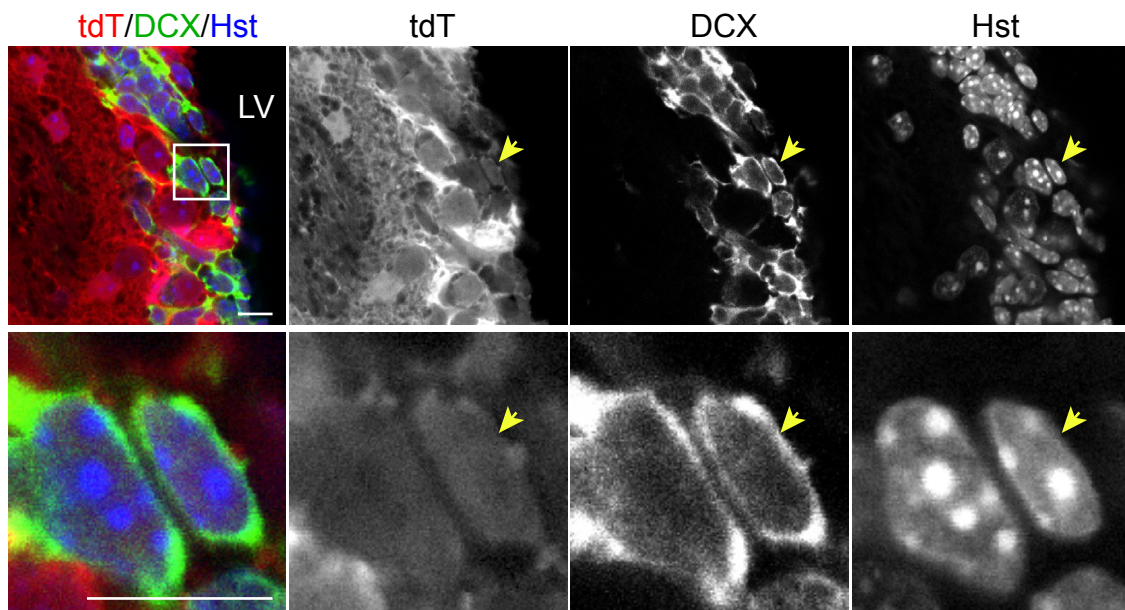

**Figure S3.** Genetic tracing of neuroblasts in the subventricular zone of adult *mGfap-Cre;Rosa-tdT* mice, related to Figure 3.

Neuroblasts in the subventricular zone were identified by DCX expression. Single-plane confocal images at 1- $\mu\text{m}$  thickness are shown. Lower panel images are the enlarged views of the boxed region in the upper panel. The arrow indicates a typical tdT-traced neuroblast. LV, lateral ventricle. Scale bars: 10  $\mu\text{m}$

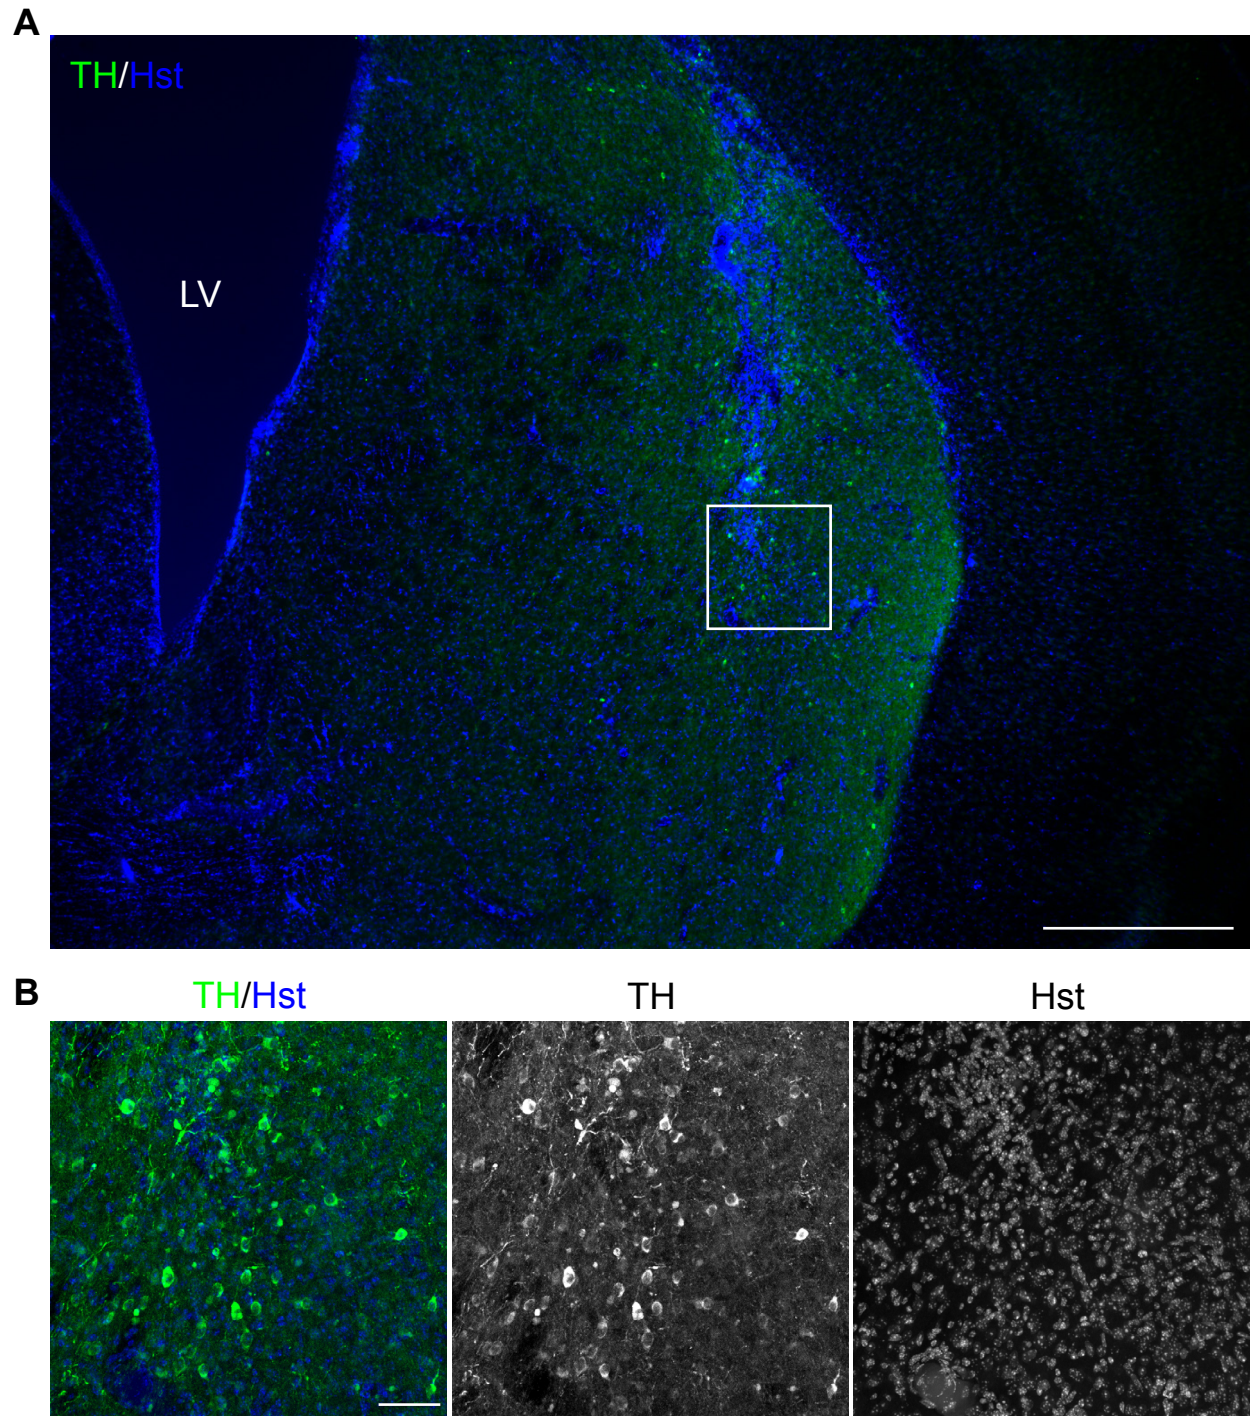

**Figure S4.** iDALs in injected striatal region far away from the lateral ventricle, related to Figure 3. (A) A low magnification image of TH<sup>+</sup> iDALs in the adult mouse striatum. These cells are detected in the virus-injected region far away from the lateral ventricle (LV). Scale bar: 1.0 mm. (B) Zoomed-in confocal images of TH<sup>+</sup> iDALs in the boxed region of panel A. Scale bar: 50  $\mu$ m.

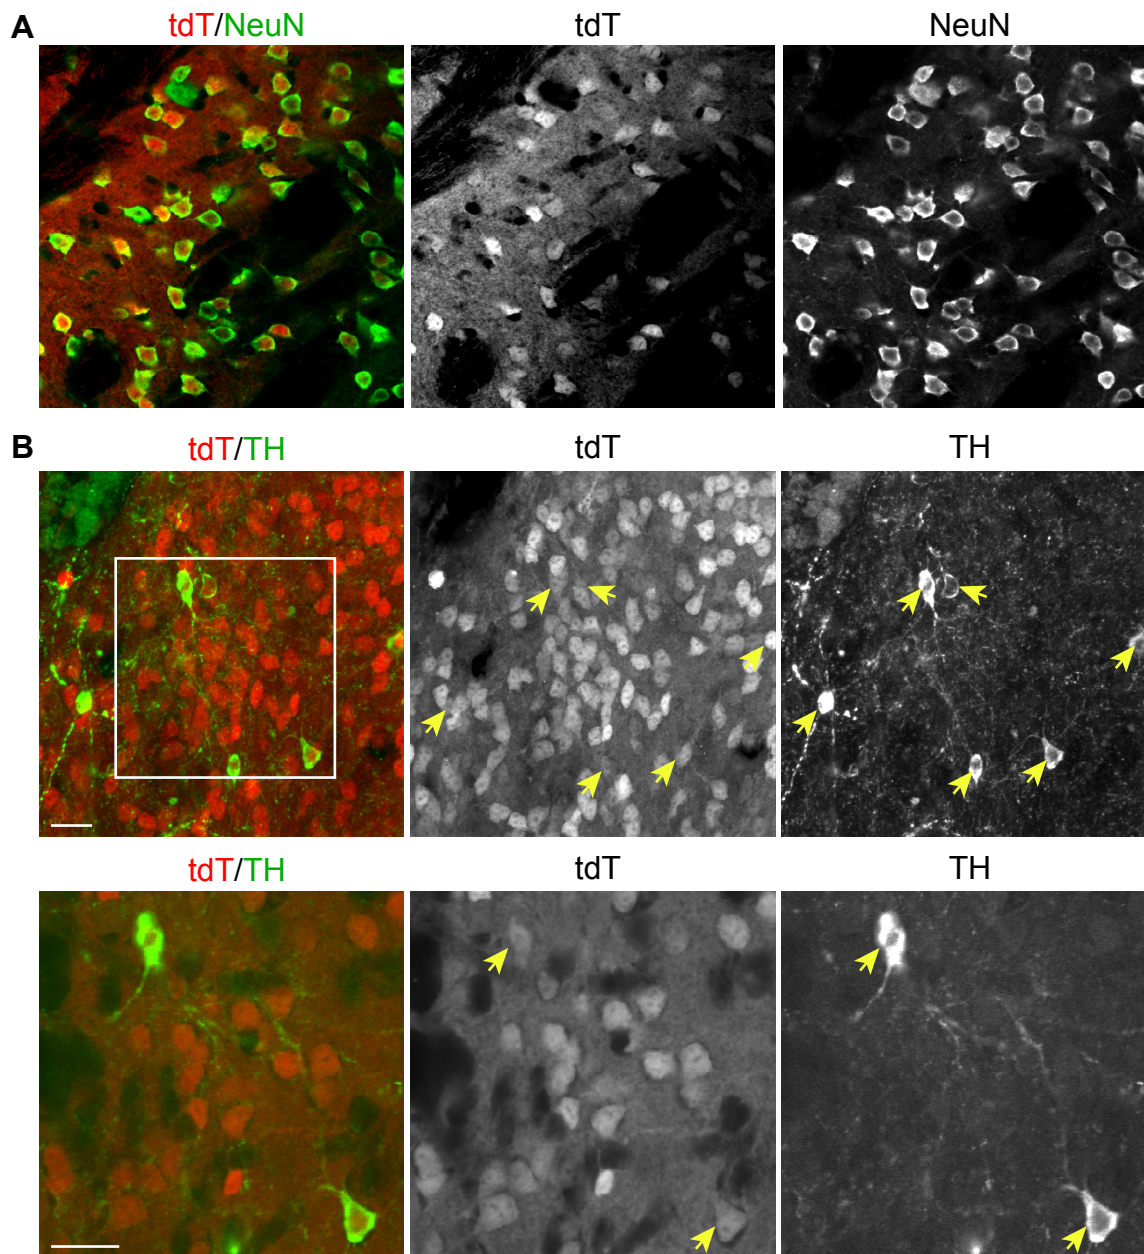

**Figure S5.** Tracing iDALs in the striatum of *Prp-CreER<sup>T</sup>;Rosa-tdT* mice, related to Figure 4. (A) Confocal images showing a majority of striatal neurons can be traced by tdT. Scale bar: 20  $\mu$ m. (B) Additional confocal images showing tdT<sup>+</sup> iDALs in the adult striatum. Single-plane confocal images at 1- $\mu$ m thickness of the boxed region in A are shown in the bottom panel. Scale bars: 20  $\mu$ m.

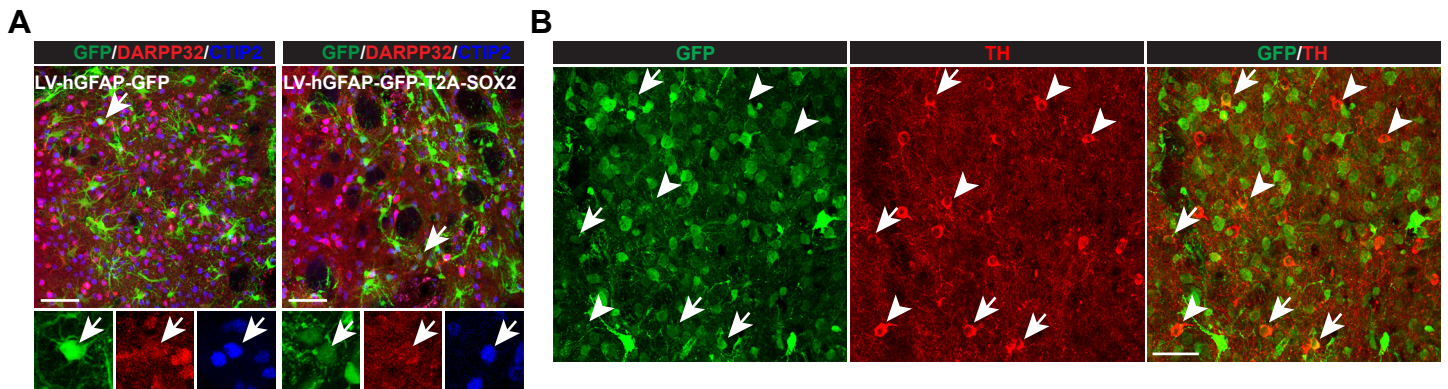

**Figure S6.** Expression of viral SOX2 in striatal neurons and iDALs, related to Figure 4.

(A) Lentiviral transduction of striatal neurons examined at 1 week post injection of virus. A representative neuron is indicated by an arrow.

(B) Expression of GFP-SOX2 in iDALs examined at 8 weeks post injection of viruses expressing GFP-SOX2, NURR1, FOXA2, and LMX1A. The mice were also treated with VPA in drinking water. Representative GFP<sup>+</sup> iDALs are indicated by arrows, whereas GFP<sup>-</sup> iDALs are shown by arrowheads. It should be noted that more neurons express the reporter GFP at this later time point.

Scale bars: 40  $\mu$ m.



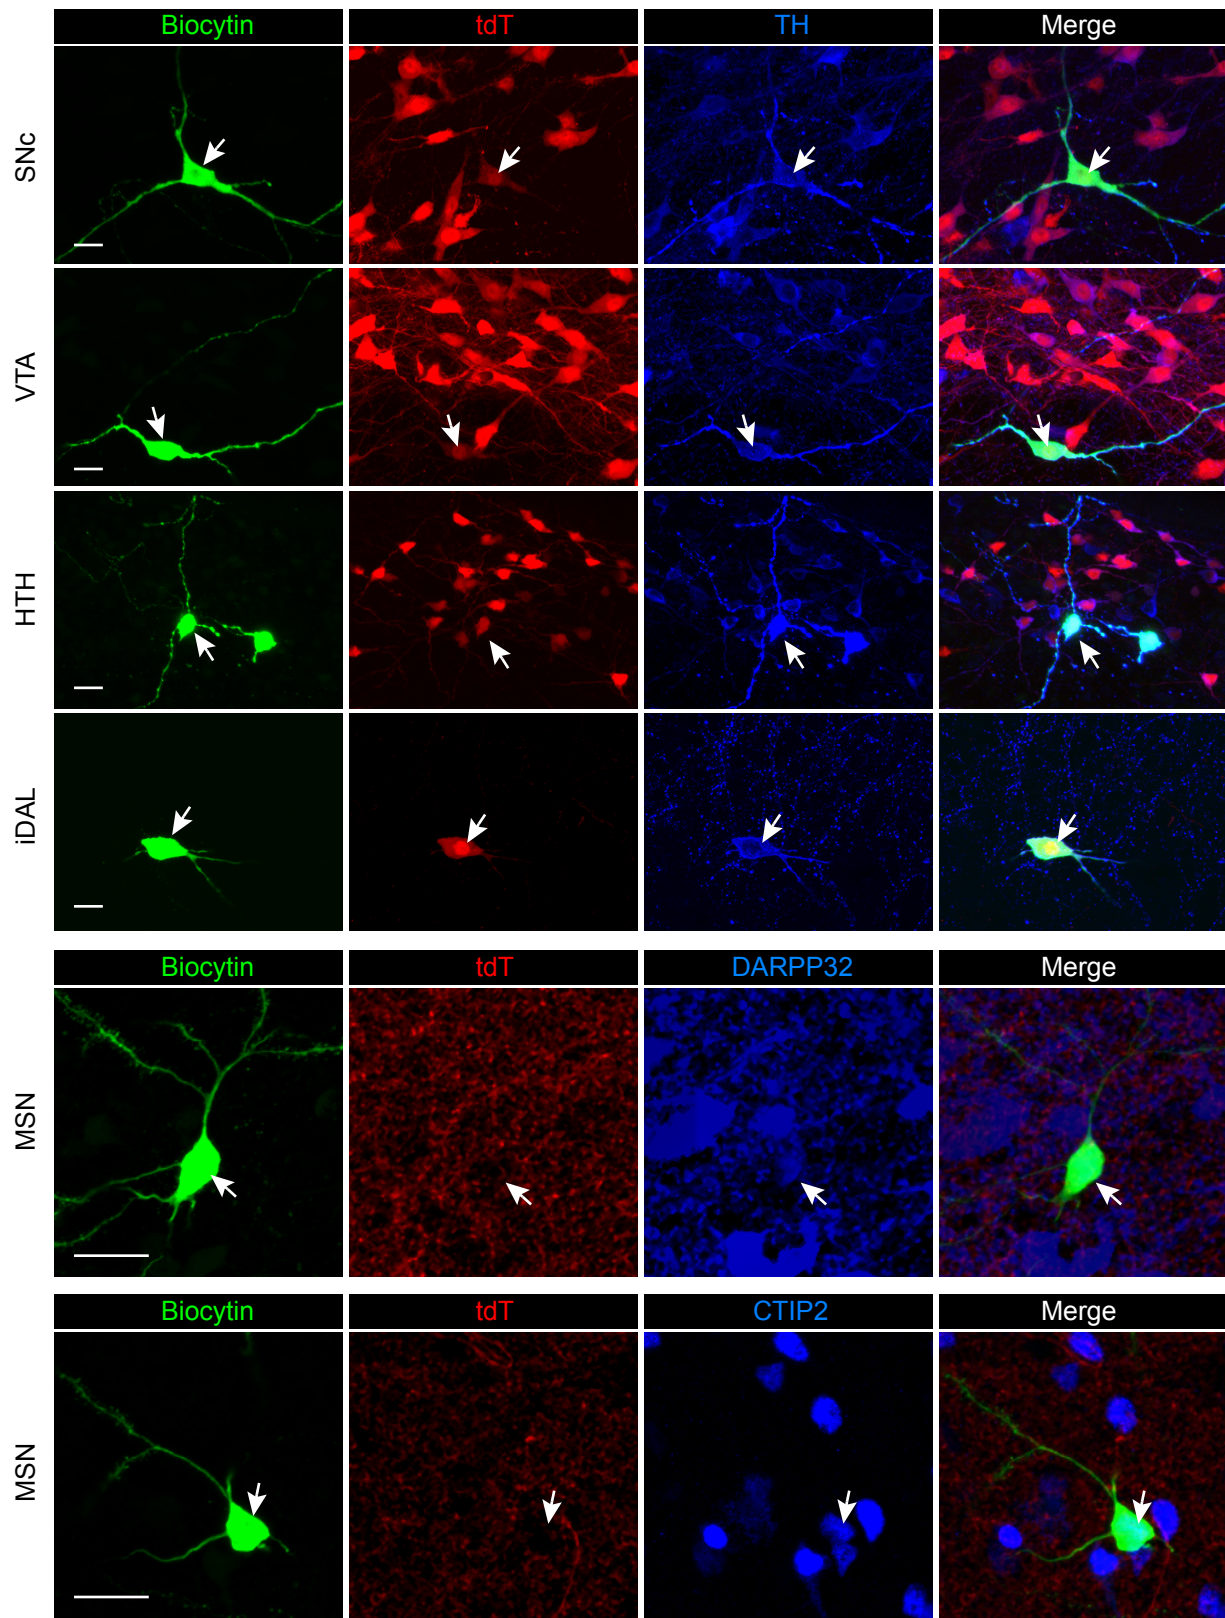

**Figure S7.** Verification of cell identity after patch-clamp recording, related to Figures 6 and 7. Some of the recorded neurons were infused with biocytin during recordings. iDALs in the striatum and endogenous DA neurons in the SNc, VTA, and HTH were traced in *Dat-Cre;Rosa-tdT* mice. Striatal MSNs are tdT-negative. Cell identities were further analyzed by immunohistochemistry with the indicated markers. Scale bars: 20  $\mu$ m.
